# Supplementary material for: Solvothermal synthesized LiMn1−xFexPO4@C nanopowders with excellent high rate and low temperature performances for lithium-ion batteries
Source: Royal Society of Chemistry journal article supplement (doi:10.1039/c6ra12472k), 2016-01-01
Supplement: c6ra12472k1.pdf [file c6ra12472k1.pdf]

**Electronic Supplementary Information for:**

**Solvothermal synthesized  $\text{LiMn}_{1-x}\text{Fe}_x\text{PO}_4@\text{C}$  nanopowders  
with excellent high rate and low temperature performances  
for lithium-ion batteries**

Bangkun Zou<sup>a</sup>, Ran Yu<sup>a</sup>, Miaomiao Deng<sup>a,b</sup>, Yuting Zhou<sup>a</sup>, Jiaying Liao<sup>a</sup>, Chunhua  
Chen<sup>a,\*</sup>

- a. CAS Key Laboratory of Materials for Energy Conversions, Department of  
Materials Science and Engineering & Collaborative Innovation Center of Suzhou  
Nano Science and Technology, University of Science and Technology of China,  
Anhui Hefei 230026, China*
- b. School of Chemistry and Chemical Engineering, HeFei University of Technology,  
Anhui Hefei 230009, China*

---

Corresponding authors: E-mail: [cchchen@ustc.edu.cn](mailto:cchchen@ustc.edu.cn); Phone: +86-551-63606971; Fax: (+86)551-63601592.

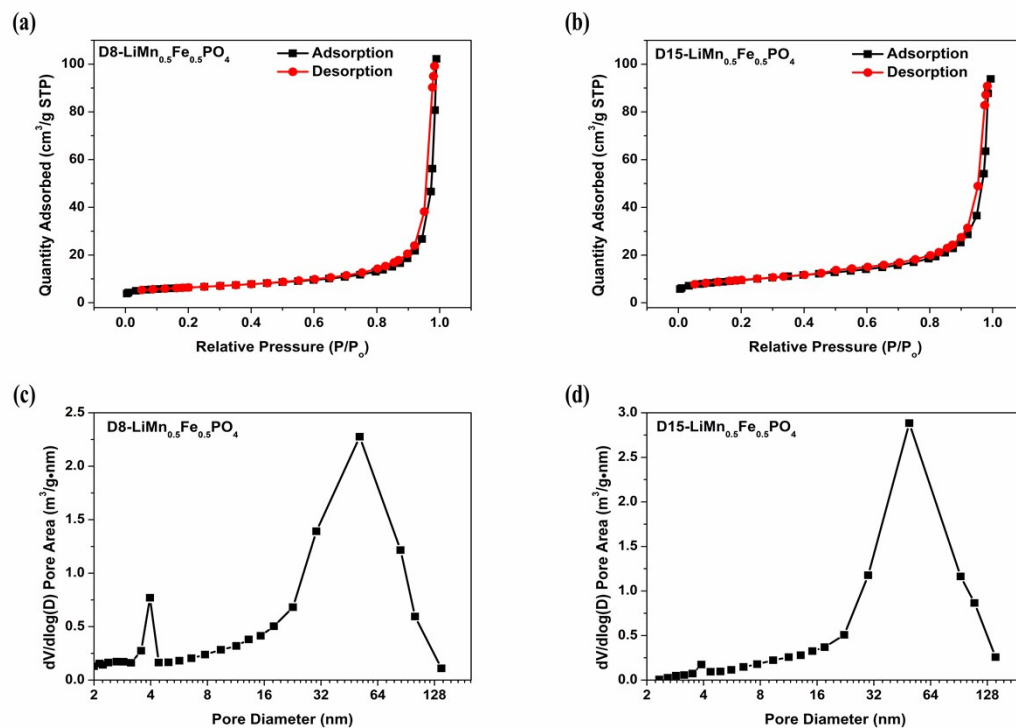

**Fig. S1** The N<sub>2</sub>-adsorption/desorption curves (a-b), and pore size distributions (c-d) of samples D8- and D15-LiMn<sub>0.5</sub>Fe<sub>0.5</sub>PO<sub>4</sub>.

(a)

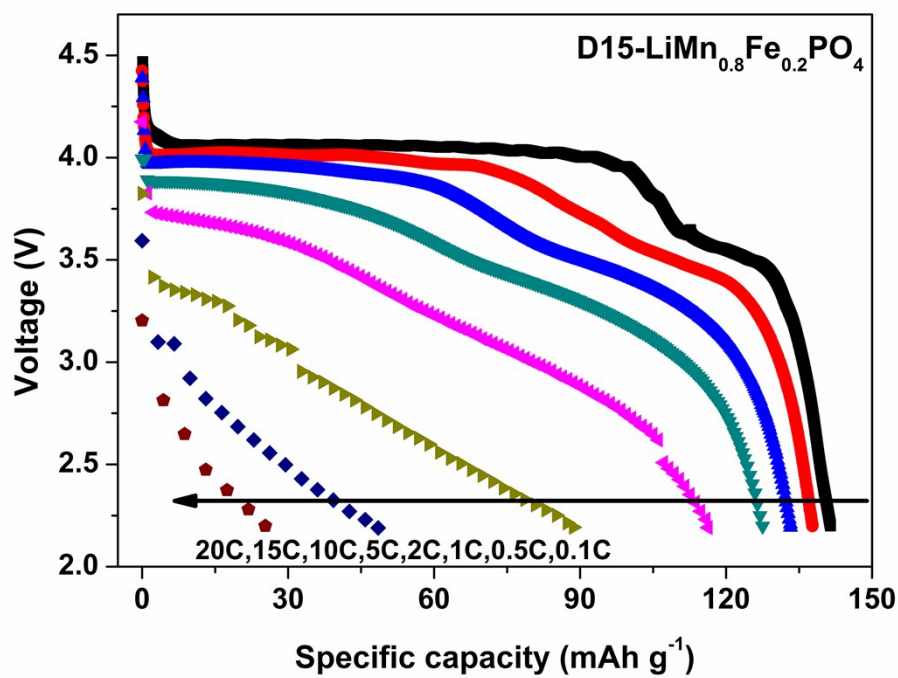

(b)

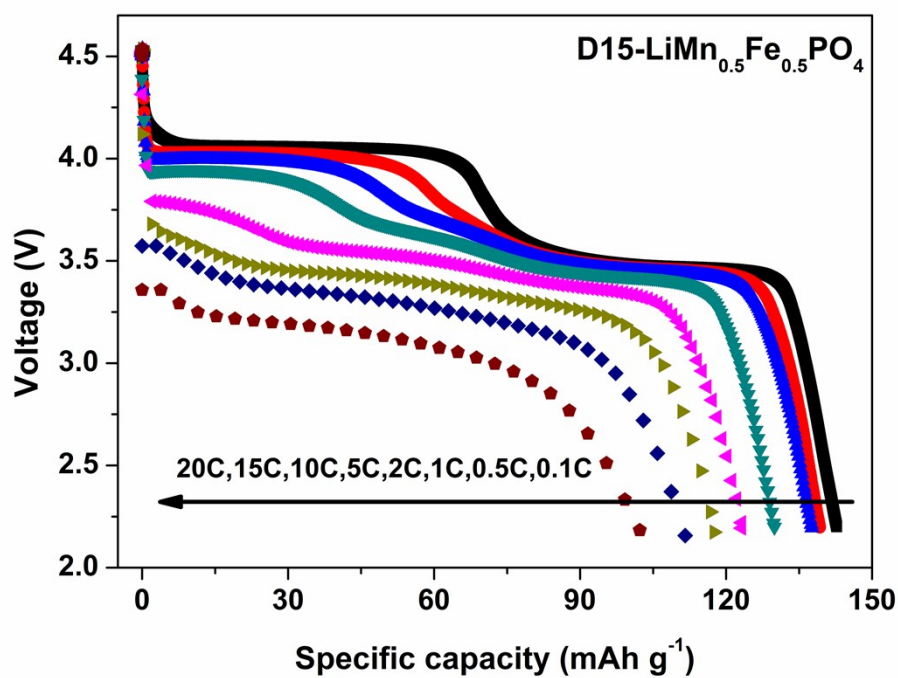

**Fig. S2** The discharge curves of D15-LiMn<sub>0.8</sub>Fe<sub>0.2</sub>PO<sub>4</sub> (a) and D15-LiMn<sub>0.5</sub>Fe<sub>0.5</sub>PO<sub>4</sub> (b) at different current densities.

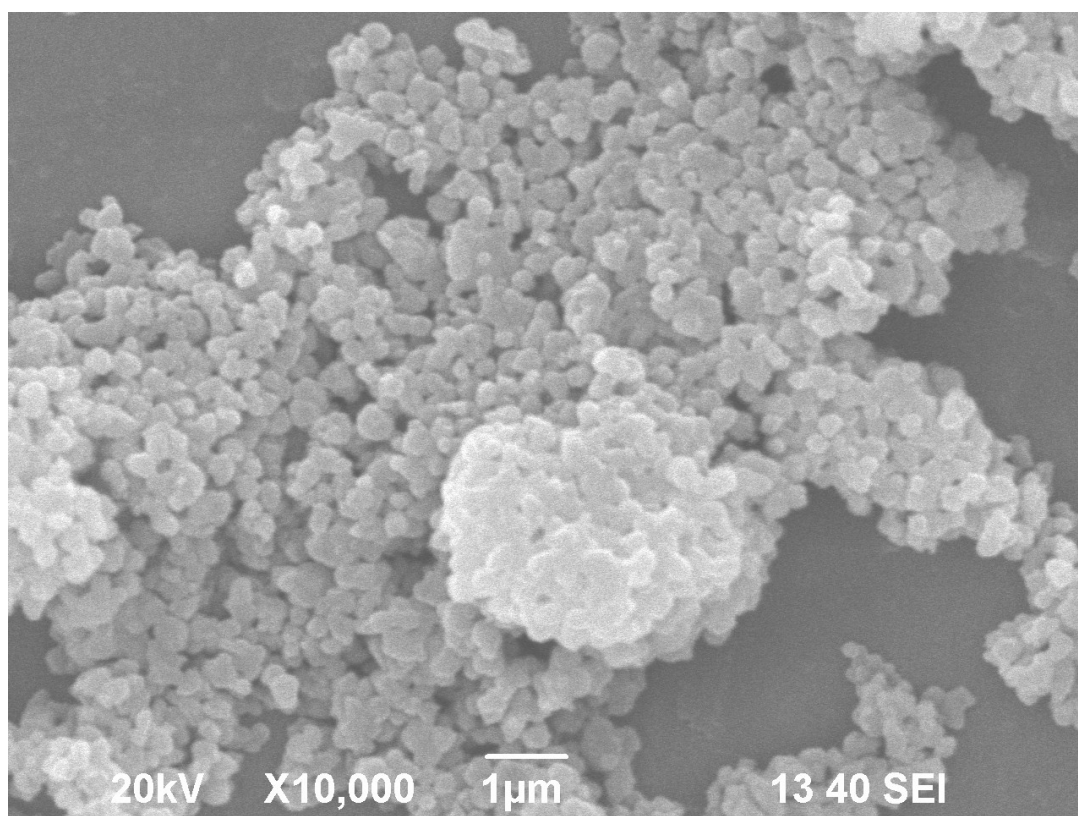

**Fig. S3** The SEM image of D0-LiFePO<sub>4</sub>.

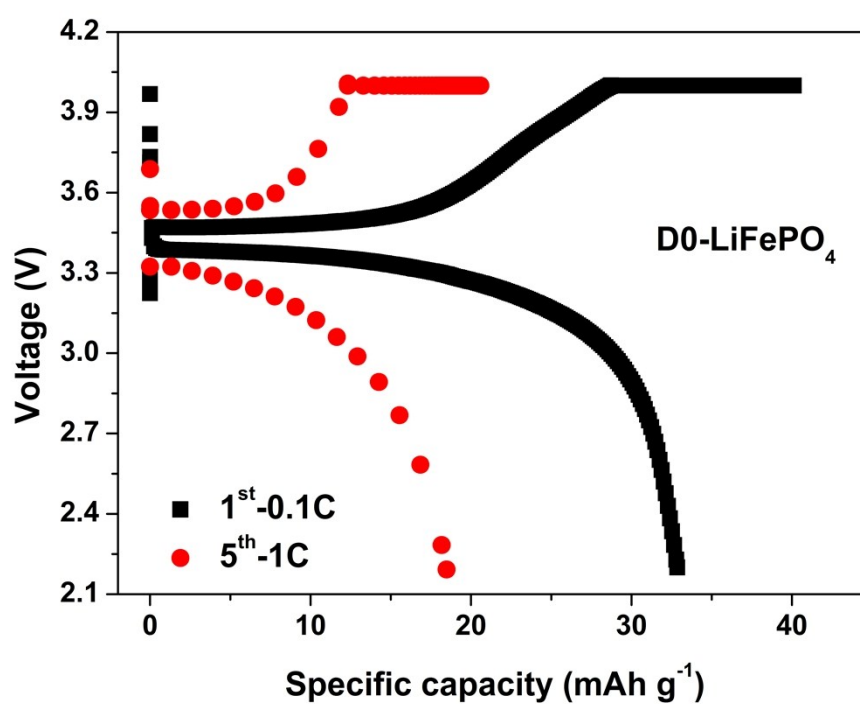

**Fig. S4** The electrochemical performance of D0-LiFePO<sub>4</sub>.

(a)

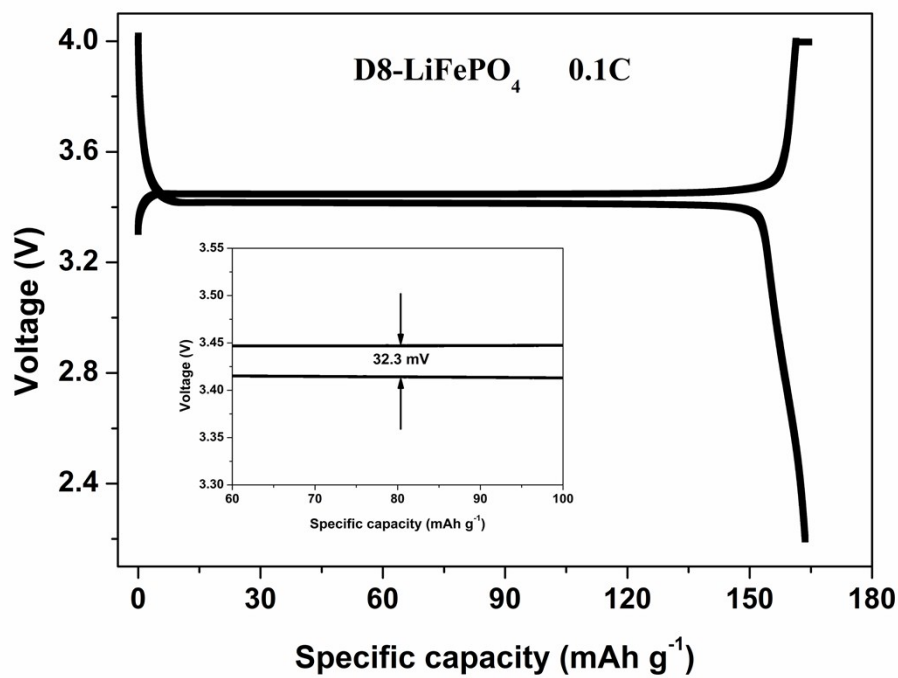

(b)

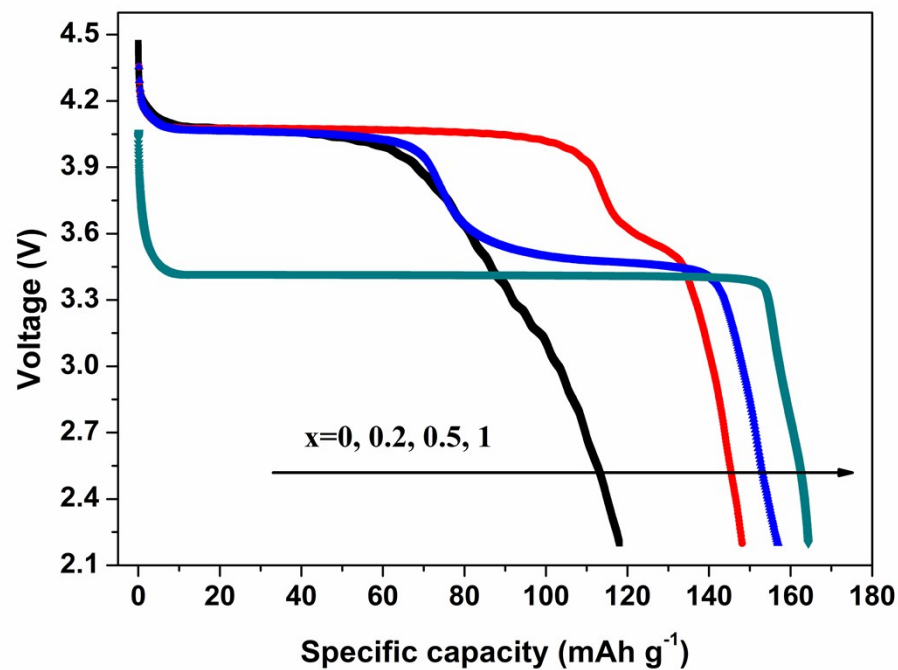

**Fig. S5** The initial charge-discharge curve of D8-LiFePO<sub>4</sub> (a) and discharge curves of samples D8-LiMn<sub>1-x</sub>Fe<sub>x</sub>PO<sub>4</sub> (x = 0, 0.2, 0.5, 1) (b) at 0.1C.
